# Supplementary material for: Quantifying the Carbon Balance of Forest Restoration and Wildfire under Projected Climate in the Fire-Prone Southwestern US
Source: PLOS journal article supplement (doi:10.1371/journal.pone.0169275), 2017-01-03
Supplement: S15 (10.1371/journal.pone.0169275.s015) [file journal.pone.0169275.s015]

S5 Table: T-test comparison of year 100 total ecosystem carbon for simulations using projected early (2010-19), mid (2050-59), and late (2090-99) century climate with wildfire for seedling establishment probabilities of 0.5 and 1.0.

| Climate Scenario | Pest0.5 (MgCha <sup>-1</sup> ) | Pest1.0(MgCha <sup>-1</sup> ) | p-value   |
|------------------|--------------------------------|-------------------------------|-----------|
| Early            | 84.8                           | 96.4                          | 0.0007322 |
| Mid              | 88.5                           | 94.1                          | 0.1365    |
| Late             | 83.5                           | 91.1                          | 0.02404   |
